# Supplementary material for: Kinetics of the reaction of H2 with Pt0-nanoparticles in aqueous suspensions monitored by the catalytic reduction of PW12O403−
Source: Royal Society of Chemistry journal article supplement (doi:10.1039/d0qi01255f), 2020-12-10
Supplement: d0qi01255f1.pdf [file d0qi01255f1.pdf]

## Supporting Information

# Kinetics of the reaction of H<sub>2</sub> with Pt<sup>0</sup>-nanoparticles in aqueous suspensions monitored by the catalytic reduction of PW<sub>12</sub>O<sub>40</sub><sup>3-</sup>

Aswin Kottapurath Vijay,<sup>a</sup> Dan Meyerstein,<sup>\*a,b</sup> Vered Marks,<sup>c</sup> Yael Albo<sup>\*d</sup>

<sup>a</sup> Department of Chemical Sciences and The Radical Research Center  
Ariel University, Ariel, Israel. E-mail: [danm@ariel.ac.il](mailto:danm@ariel.ac.il)

<sup>b</sup> Chemistry Department  
Ben-Gurion University, Beer-Sheva, Israel

<sup>c</sup> Department of Chemical Sciences  
Ariel University, Ariel, Israel

<sup>d</sup> Department of Chemical Engineering and The Radical Research Center  
Ariel University, Ariel, Israel.  
E-mail: [yaelvt@ariel.ac.il](mailto:yaelvt@ariel.ac.il)

## Table of contents

|                                                                   |    |
|-------------------------------------------------------------------|----|
| Sample preparation for HR-TEM, Cryo-TEM and NMR spectroscopy..... | 2  |
| Figure S1.....                                                    | 3  |
| Figure S2.....                                                    | 4  |
| Figure S3.....                                                    | 4  |
| Figure S4.....                                                    | 5  |
| Table S1.....                                                     | 5  |
| Figure S5.....                                                    | 6  |
| Table S2.....                                                     | 6  |
| Figure S6.....                                                    | 7  |
| Table S3.....                                                     | 7  |
| Figure S7.....                                                    | 8  |
| Table S4.....                                                     | 8  |
| Figure S8.....                                                    | 9  |
| Table S5.....                                                     | 9  |
| Figure S9.....                                                    | 10 |
| Table S6.....                                                     | 10 |
| Figure S10.....                                                   | 11 |
| Table S7.....                                                     | 11 |

### Sample Preparation for High-Resolution TEM (HR-TEM)

The Pt<sup>0</sup> NPs and Pt<sup>0</sup>-POM nanoparticles were characterized using HR TEM (JEOL 2100, operated at 200 KeV,) equipped with an EDS system for composition analysis. The samples were prepared by dispersing the NPs in an isopropanol-water mixture and placing one drop of the suspension onto a 400 mesh copper grid. The grids were dried in air prior to the measurement.

### Samples preparation for Transmission Electron Microscopy (Cryo-TEM).

A FEI Tecnai 12 G<sup>2</sup> transmission electron microscope (120 kV), equipped with a Gatan slow-scan camera (for imaging) was used for Cryo-TEM measurements. Cryogenically frozen samples were prepared using a fully automated vitrification device (Vitrobot, FEI). First, 5 µL of the POM protected Pt<sup>0</sup> nanoparticles suspension was placed by pipet onto a glow discharged Cu grid covered with a lacey-carbon film, held inside a 100%-humidity chamber. The grid was mechanically "blotted" and immediately plunged into liquid ethane (mp 90.34 K) cooled by liquid nitrogen (77.2 K).

### NMR Spectroscopy

**The NMR spectra** were measured on a 400 MHz Bruker Avance III HD (<sup>1</sup>H 400MHz, <sup>31</sup>P 162MHz, and <sup>195</sup>Pt 86 MHz) spectrometer equipped with a 5 mm tunable broadband probe (BBFO). All the samples were dissolved in solutions of H<sub>2</sub>O (90%)/D<sub>2</sub>O (10%) and the NMR experiments were performed at 300 K.

**<sup>1</sup>H NMR spectra** were acquired using a pre-saturation experiment (*zgpr*) and the remaining signal for water was used as an internal reference, (4.79 ppm for H<sub>2</sub>O), for the chemical shifts. ([Pt] = 0.50 mM)

**<sup>31</sup>P{<sup>1</sup>H} NMR spectra** were acquired using a proton decoupling experiment (*zgpg*) with an equal number of scans among all the samples. A solution of 85% H<sub>3</sub>PO<sub>4</sub> in H<sub>2</sub>O (0 ppm for <sup>31</sup>PO<sub>4</sub>) was used as an external reference. ([Pt] = 0.25 mM, [POM] = 10.0 mM)

**<sup>195</sup>Pt NMR spectra** were acquired in different arrays through the large chemical shift range of the <sup>195</sup>Pt nucleus (approximately 10,000 ppm). The pulse sequence was a simple 1D pulse of 90° (*zg*) and the acquisition time of each experiment took an hour. The chemical shifts were determined compared to the external reference of 0.1M K<sub>2</sub>PtCl<sub>4</sub> in D<sub>2</sub>O (-1623 ppm relative to Na<sub>2</sub>PtCl<sub>6</sub> in H<sub>2</sub>O). The final pH of the solution was ~ 1.6. ([Pt] = 5 mM, [POM] = 10.0 mM)

### Calculations for the number of Pt atoms on the surface

[NP] = C/ n, where C = 0.5 mM = 0.5 × 10<sup>-3</sup> M    where C = Concentration of Pt<sup>0</sup>, based on the [K<sub>2</sub>PtCl<sub>4</sub>], n = number of Pt atoms per particle

$$n = \frac{4}{3} \pi r^3 \frac{N}{M.W} \rho$$

For Pt,

$$\rho_{Pt} = 21.4 \text{ g/cm}^3$$

$$M.W. = 195 \text{ g/mol}$$

$$\text{Diameter of Pt nanoparticle} = 2.0 \text{ nm} \quad r = 1.0 \text{ nm} = 1.0 \times 10^{-7} \text{ cm}$$

From the calculations,

$n = 276.8$  Pt atoms/ Pt NPs

Therefore,

$$[\text{NP}] = \frac{0.5 \times 10^{-3} \text{ mol/L}}{276.8}$$

$$[\text{NP}] = 1.81 \times 10^{-6} \left[ \frac{\text{mole of Pt nanoparticles}}{\text{L}} \right]$$

Number of Pt atoms on the surface of the NPs ( $n_s$ ),

$$n_s = n \left[ \frac{r^3 - (r - 2r_{\text{Pt}})^3}{r^3} \right] \quad r_{\text{Pt}} = 1.39 \text{ \AA} = 1.39 \times 10^{-8} \text{ cm} \quad r = 1.0 \times 10^{-9} \text{ m} = 1.0 \times 10^{-7} \text{ cm}$$

$n_s = 170$  Number of Pt atoms on the surface of one NP. This is for Pt with radius 1nm.

For,  $r=2$  nm by same calculations,  $n=2213$  atoms per particle and  $n_s=800$  atoms/particle

## <sup>1</sup>H NMR

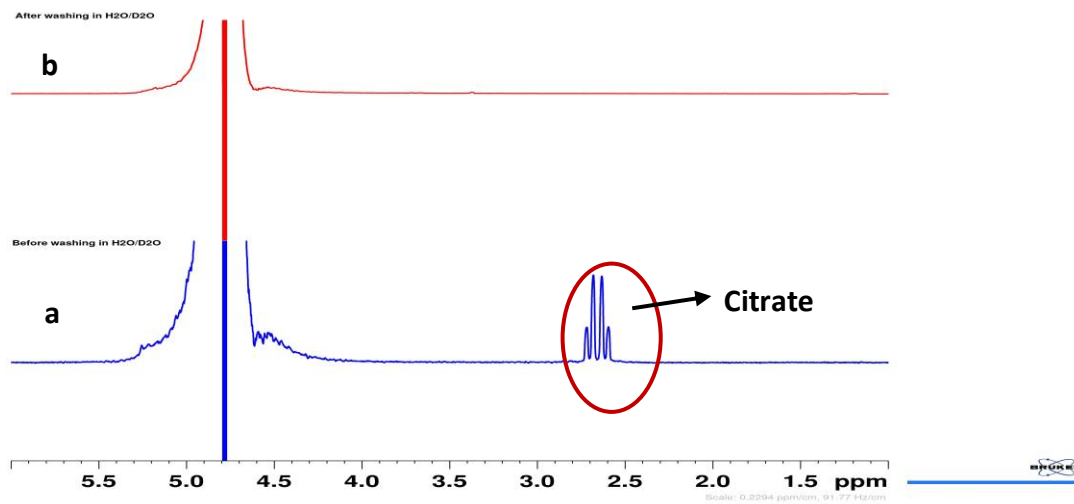

**Figure S1.** <sup>1</sup>H NMR (400 MHz, 90 % H<sub>2</sub>O/10 % D<sub>2</sub>O, 300 K) spectrum of synthesized Pt nanoparticles (0.50 mM)

- (a) before washing (blue color)
- (b) after washing with resin (red color)

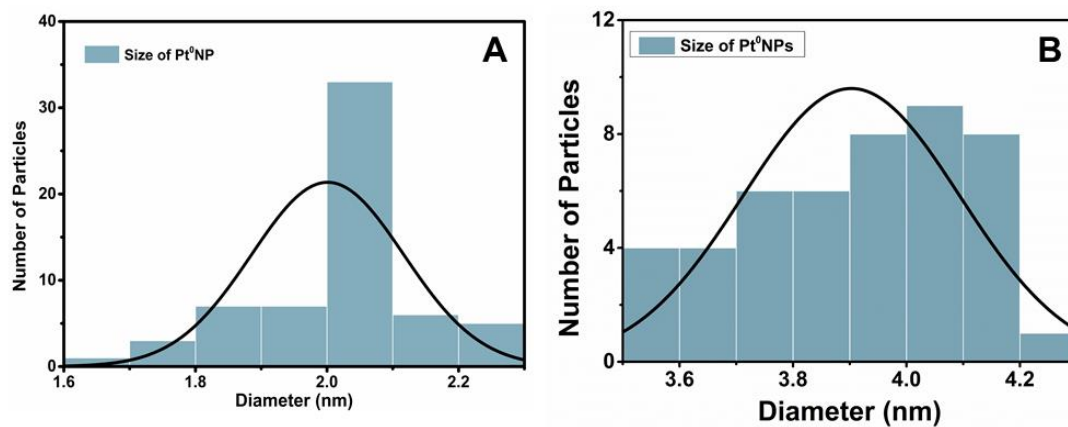

**Figure S2.** Size distribution curve of synthesized Pt<sup>0</sup> NPs (From HR-TEM)

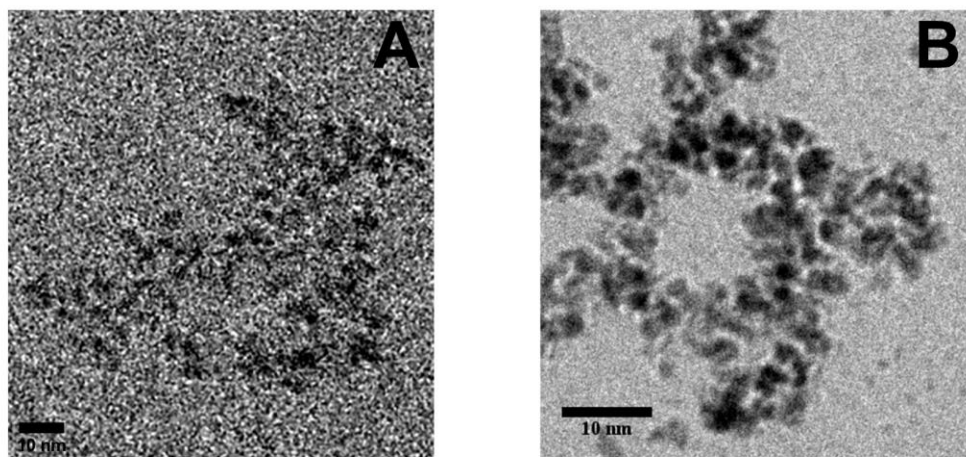

**Figure S3.** Cryo-TEM images (A) citrate-protected and (B) PW<sub>12</sub>O<sub>40</sub><sup>3-</sup> protected Pt<sup>0</sup>-NPs

# Pt<sup>0</sup>NP@POM-H<sub>2</sub> (2 nm Pt)

## POM dependence

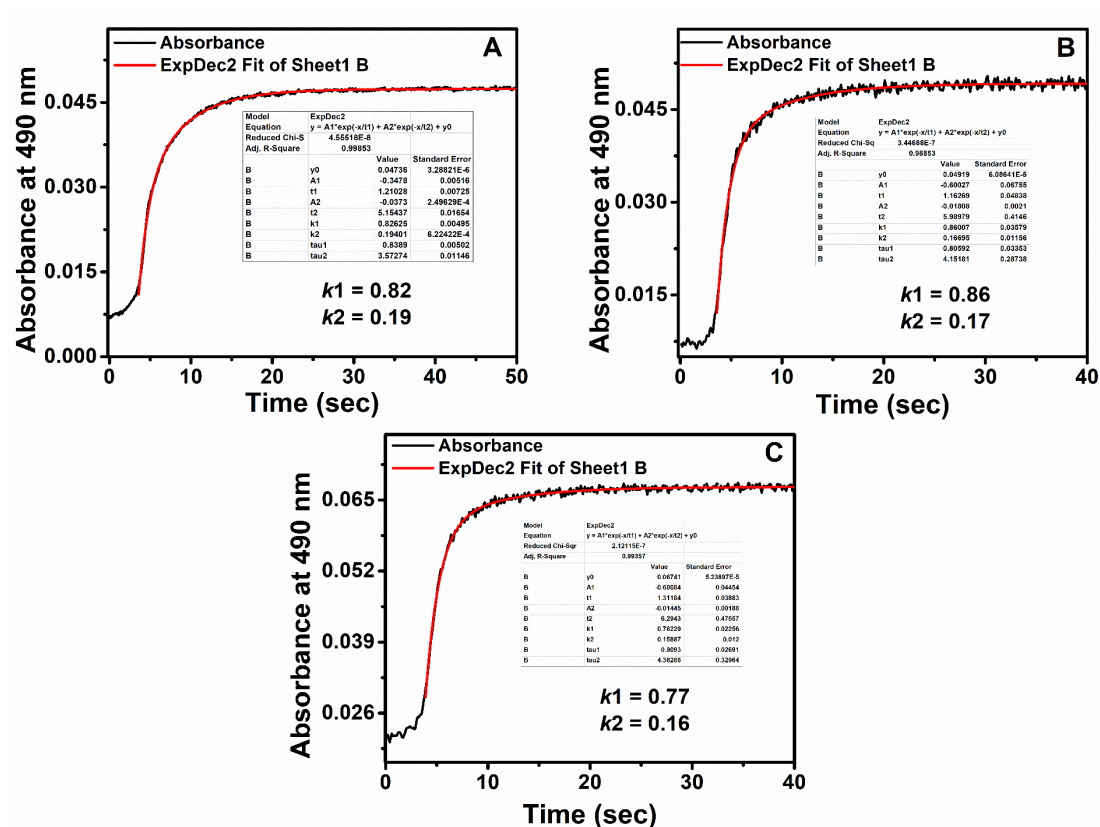

**Figure S4.** Typical kinetic curves of the reaction of Pt<sup>0</sup>-NP@PW<sub>12</sub>O<sub>40</sub><sup>3-</sup> with three different concentrations of PW<sub>12</sub>O<sub>40</sub><sup>3-</sup> with H<sub>2</sub> saturated water (pH = 1.5) at 490 nm.

**Table S1.** The  $k_{\text{obs}}$  values and the ratio of their absorbance for three different concentrations of PW<sub>12</sub>O<sub>40</sub><sup>3-</sup> (0.00005, 0.0001, and 0.00015 mol/L) by maintaining a constant concentration of surface Pt atoms ( $6.14 \times 10^{-5}$  mol/L) and H<sub>2</sub> (0.00040 mol/L).

| Concentration of<br>H <sub>3</sub> PW <sub>12</sub> O <sub>40</sub><br>(mol/L) | $k_{\text{obs}}$ s <sup>-1</sup><br>in Pt <sup>0</sup> -POM<br>$k_1$ | $k_{\text{obs}}$ s <sup>-1</sup><br>in Pt <sup>0</sup> -POM<br>$k_2$ | Ratio of<br>Absorbance<br>A1/A2 |
|--------------------------------------------------------------------------------|----------------------------------------------------------------------|----------------------------------------------------------------------|---------------------------------|
| 0.000050                                                                       | 0.82                                                                 | 0.19                                                                 | 9.69                            |
| 0.00010                                                                        | 0.86                                                                 | 0.17                                                                 | 33.20                           |
| 0.00015                                                                        | 0.77                                                                 | 0.16                                                                 | 42.0                            |

## Pt dependence

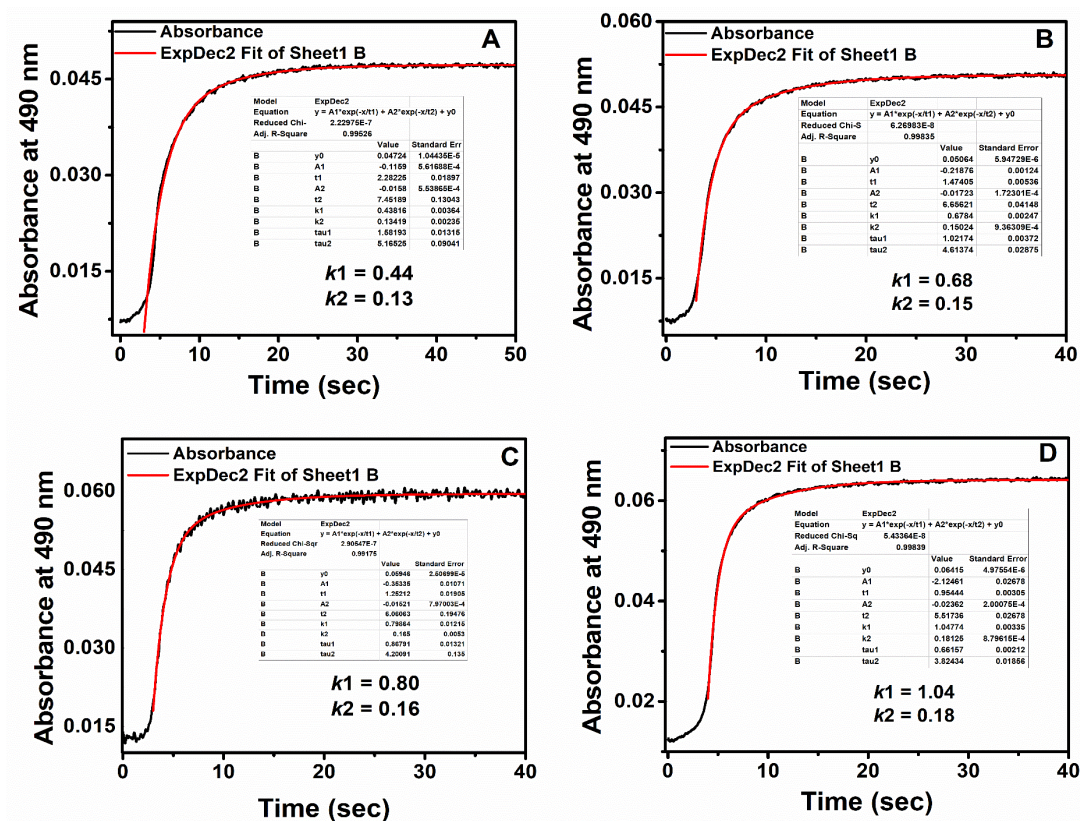

**Figure S5.** A typical kinetic curve of the reaction of  $\text{Pt}^0\text{-NP@PW}_{12}\text{O}_{40}^{3-}$  with four different concentrations of surface Pt atoms with  $\text{H}_2$  saturated water (pH = 1.6) at 490 nm.

**Table S2.** The  $k_{\text{obs}}$  values and the ratio of their absorbance for four different concentrations of surface Pt atoms by maintaining a constant concentration of  $\text{PW}_{12}\text{O}_{40}^{3-}$  (0.00010 mol/L) and  $\text{H}_2$  (0.00040 mol/L).

| Concentration of Pt atoms on the surface (mol/L) | $k_{\text{obs}} \text{ s}^{-1}$ in $\text{Pt}^0\text{-POM}$ $k_1$ | $k_{\text{obs}} \text{ s}^{-1}$ in $\text{Pt}^0\text{-POM}$ $k_2$ | Ratio of Absorbance $A_1/A_2$ |
|--------------------------------------------------|-------------------------------------------------------------------|-------------------------------------------------------------------|-------------------------------|
| $3.07 \times 10^{-5}$                            | 0.44                                                              | 0.13                                                              | 7.33                          |
| $4.91 \times 10^{-5}$                            | 0.68                                                              | 0.15                                                              | 13.0                          |
| $6.14 \times 10^{-5}$                            | 0.80                                                              | 0.16                                                              | 23.23                         |
| $7.67 \times 10^{-5}$                            | 1.04                                                              | 0.18                                                              | 90.0                          |

## H<sub>2</sub> dependence

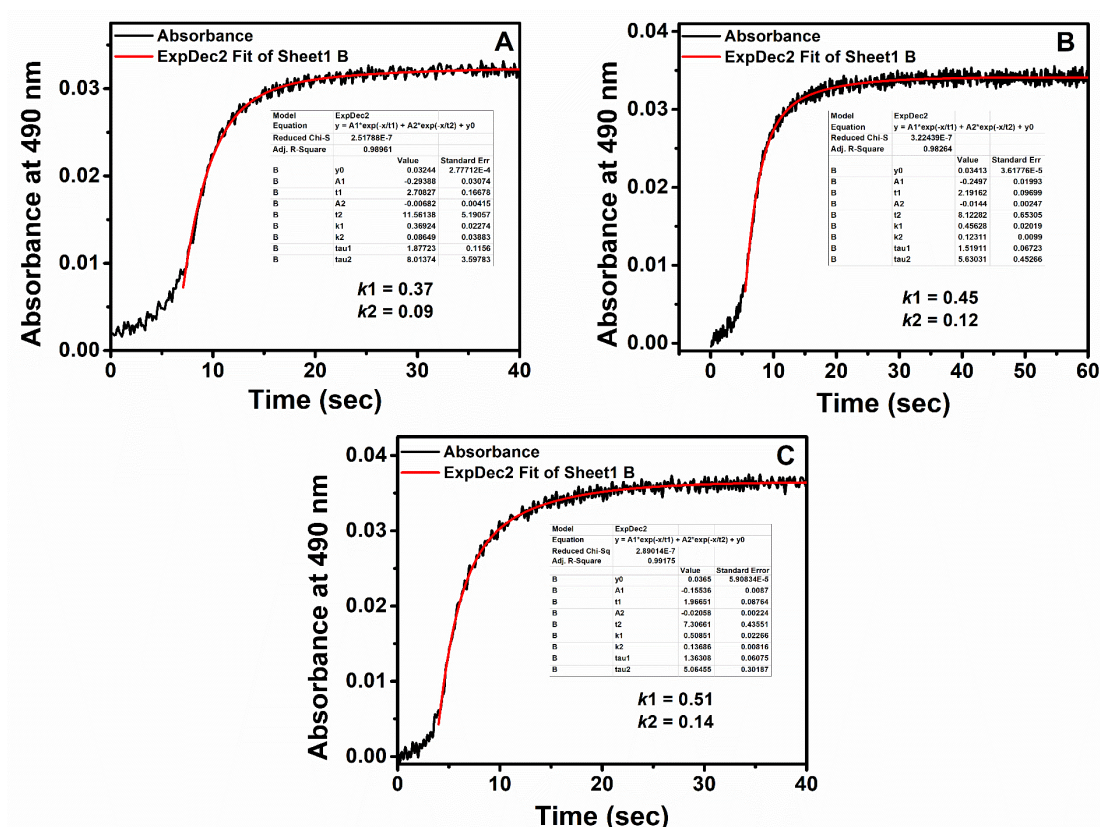

**Figure S6.** A typical kinetic curve of the reaction  $\text{Pt}^0\text{-NP@PW}_{12}\text{O}_{40}^{3-}$  with three different concentrations of  $\text{H}_2$  saturated water (pH 1.5) at 490 nm.

**Table S3.** The  $k_{\text{obs}}$  values and ratio of their absorbance for four different concentrations of  $\text{H}_2$  by maintaining a constant concentration of  $\text{PW}_{12}\text{O}_{40}^{3-}$  (0.00010 mol/L) and surface Pt atoms ( $7.68 \times 10^{-6}$  mol/L).

| Concentration<br>of $\text{H}_2$<br>(mol/L) | $k_{\text{obs}} \text{ s}^{-1}$<br>in $\text{Pt}^0\text{-POM}$<br>$k_1$ | $k_{\text{obs}} \text{ s}^{-1}$<br>in $\text{Pt}^0\text{-POM}$<br>$k_2$ | Ratio of<br>Absorbance<br>$A_1/A_2$ |
|---------------------------------------------|-------------------------------------------------------------------------|-------------------------------------------------------------------------|-------------------------------------|
| 0.00030                                     | 0.37                                                                    | 0.09                                                                    | 43.10                               |
| 0.00036                                     | 0.45                                                                    | 0.12                                                                    | 17.25                               |
| 0.00040                                     | 0.51                                                                    | 0.14                                                                    | 7.50                                |

## Pt-H<sub>2</sub>-POM (2 nm Pt)

### POM dependence

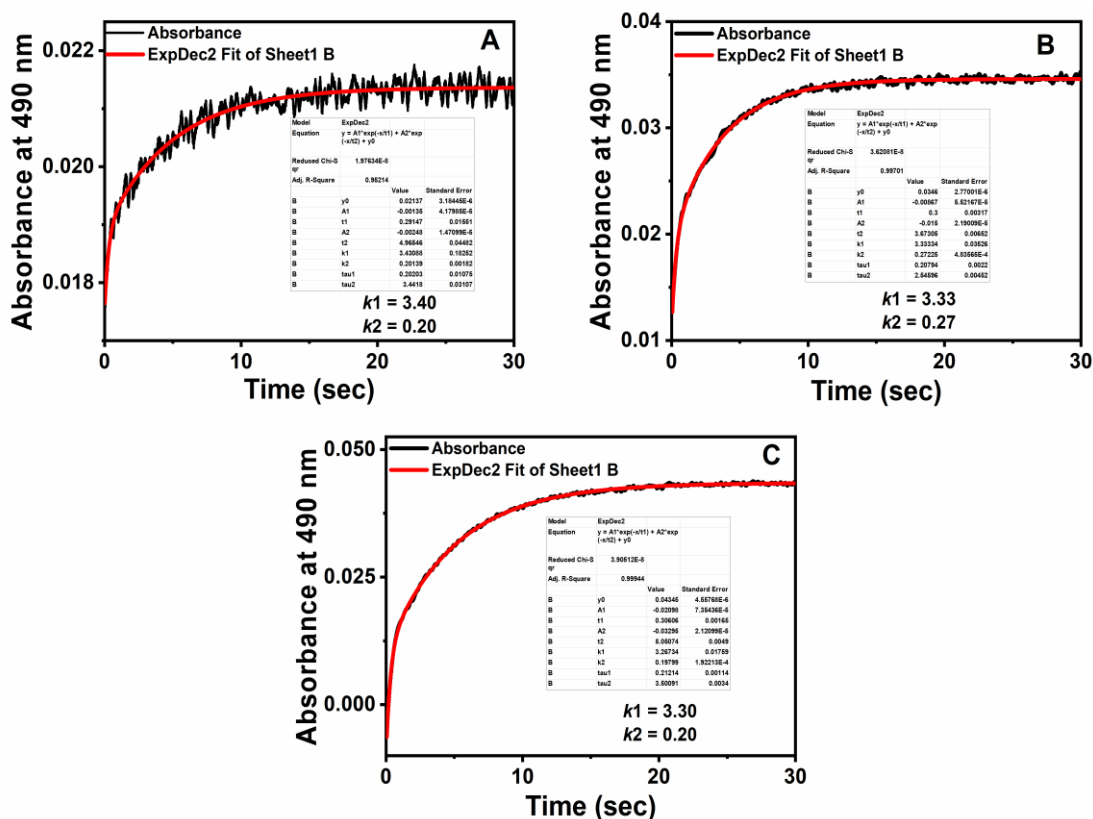

**Figure S7.** A typical kinetic curve of the reaction of Pt<sup>0</sup>-NP-H<sub>2</sub> with three different concentrations of PW<sub>12</sub>O<sub>40</sub><sup>3-</sup> at 490 nm.

**Table S4.** The  $k_{\text{obs}}$  values and the ratio of their absorbance for three different concentrations of PW<sub>12</sub>O<sub>40</sub><sup>3-</sup> by maintaining a constant concentration of surface Pt<sup>0</sup> atoms ( $3.07 \times 10^{-5}$  mol/L) and H<sub>2</sub> (0.00040 mol/L)

| Concentration of<br>H <sub>3</sub> PW <sub>12</sub> O <sub>40</sub><br>(mol/L) | $k_{\text{obs}}$ s <sup>-1</sup><br>in Pt <sup>0</sup> -POM<br>$k_1$ | $k_{\text{obs}}$ s <sup>-1</sup><br>in Pt <sup>0</sup> -POM<br>$k_2$ | Ratio of<br>Absorbance<br>A1/A2 |
|--------------------------------------------------------------------------------|----------------------------------------------------------------------|----------------------------------------------------------------------|---------------------------------|
| 0.000010                                                                       | 3.40                                                                 | 0.20                                                                 | 0.50                            |
| 0.000080                                                                       | 3.33                                                                 | 0.27                                                                 | 0.54                            |
| 0.00015                                                                        | 3.30                                                                 | 0.20                                                                 | 0.64                            |

## Pt dependence

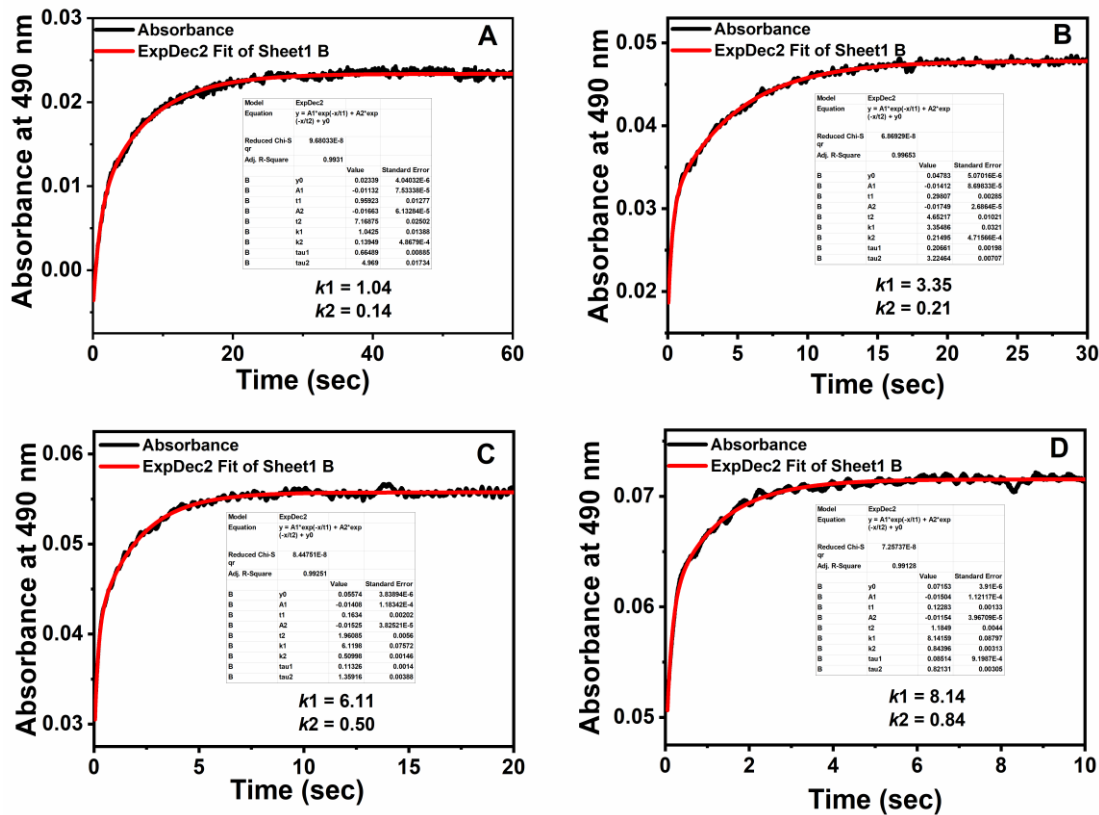

**Figure S8.** A typical kinetic curve of the reaction of Pt°-NP-H<sub>2</sub> with four different concentrations of surface Pt atoms at 490 nm.

**Table S5.** The  $k_{\text{obs}}$  values and the ratio of their absorbance for four different concentrations of surface Pt atoms by maintaining a constant concentration of PW<sub>12</sub>O<sub>40</sub><sup>3-</sup> (0.00010 mol/L) and H<sub>2</sub> (0.00040 mol/L).

| Concentration of Pt atoms on the surface (mol/L) | $k_{\text{obs}} \text{ s}^{-1}$ in Pt <sup>0</sup> -POM $k_1$ | $k_{\text{obs}} \text{ s}^{-1}$ in Pt <sup>0</sup> -POM $k_2$ | Ratio of Absorbance A1/A2 |
|--------------------------------------------------|---------------------------------------------------------------|---------------------------------------------------------------|---------------------------|
| $6.14 \times 10^{-6}$                            | 1.04                                                          | 0.14                                                          | 0.68                      |
| $3.07 \times 10^{-5}$                            | 3.35                                                          | 0.21                                                          | 0.80                      |
| $6.14 \times 10^{-5}$                            | 6.11                                                          | 0.50                                                          | 0.92                      |
| $9.21 \times 10^{-5}$                            | 8.14                                                          | 0.84                                                          | 1.30                      |

# Pt<sup>0</sup>NP@POM-H<sub>2</sub> (4 nm Pt)

## Pt dependence

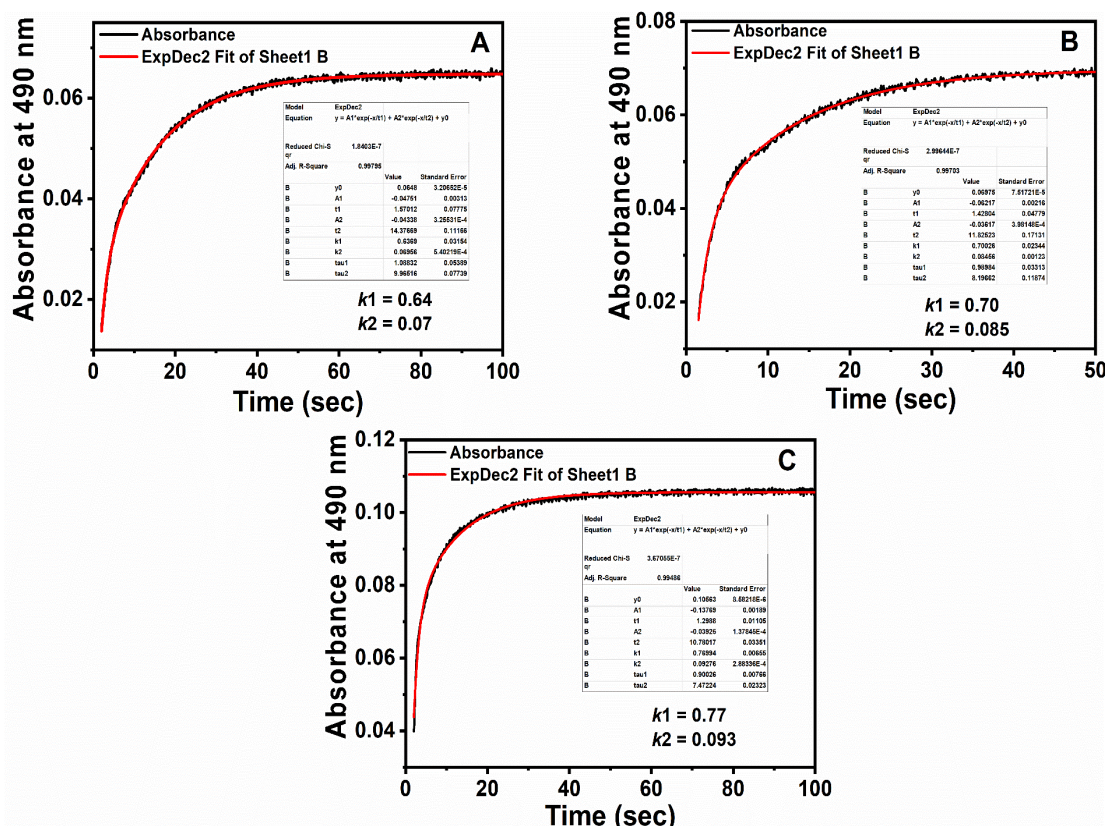

**Figure S9.** A typical kinetic curve of the reaction of Pt<sup>0</sup>-NP@PW<sub>12</sub>O<sub>40</sub><sup>3-</sup> with three different concentrations of surface Pt atoms (Pt = 4nm) with H<sub>2</sub> saturated water (pH = 1.6) at 490 nm.

**Table S6.** The  $k_{obs}$  values and the ratio of their absorbance for three different concentrations of surface Pt atoms by maintaining a constant concentration of PW<sub>12</sub>O<sub>40</sub><sup>3-</sup> (0.00020 mol/L) and H<sub>2</sub> (0.00040 mol/L).

| Concentration of Pt atoms on the surface (mol/L) | $k_{obs} \text{ s}^{-1}$ in Pt <sup>0</sup> -POM<br>$k_1$ | $k_{obs} \text{ s}^{-1}$ in Pt <sup>0</sup> -POM<br>$k_2$ | Ratio of Absorbance<br>$A1/A2$ |
|--------------------------------------------------|-----------------------------------------------------------|-----------------------------------------------------------|--------------------------------|
| $6.78 \times 10^{-6}$                            | 0.64                                                      | 0.07                                                      | 1.10                           |
| $1.80 \times 10^{-5}$                            | 0.70                                                      | 0.085                                                     | 1.71                           |
| $2.71 \times 10^{-5}$                            | 0.77                                                      | 0.093                                                     | 3.50                           |

## Pt-H<sub>2</sub>-POM (4 nm Pt)

### Pt dependence

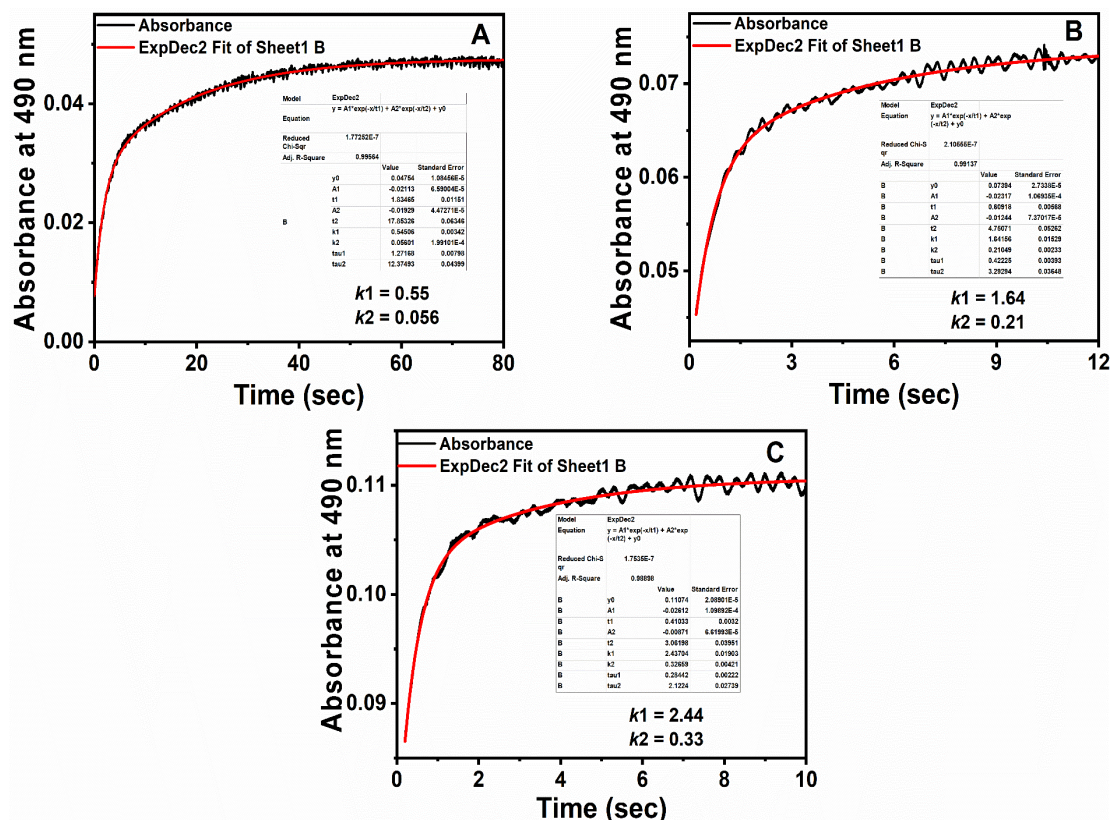

**Figure S10.** A typical kinetic curve of the reaction of Pt°-NP-H<sub>2</sub> with three different concentrations of surface Pt atoms (Pt = 4nm) at 490 nm.

**Table S7.** The  $k_{\text{obs}}$  values and the ratio of their absorbance for three different concentrations of surface Pt atoms by maintaining a constant concentration of PW<sub>12</sub>O<sub>40</sub><sup>3-</sup> (0.00020 mol/L) and H<sub>2</sub> (0.00040 mol/L).

| Concentration of Pt atoms on the surface (mol/L) | $k_{\text{obs}} \text{ s}^{-1}$ in Pt <sup>0</sup> -POM $k_1$ | $k_{\text{obs}} \text{ s}^{-1}$ in Pt <sup>0</sup> -POM $k_2$ | Ratio of Absorbance $A_1/A_2$ |
|--------------------------------------------------|---------------------------------------------------------------|---------------------------------------------------------------|-------------------------------|
| $6.78 \times 10^{-6}$                            | 0.55                                                          | 0.056                                                         | 1.10                          |
| $2.71 \times 10^{-5}$                            | 1.64                                                          | 0.21                                                          | 1.90                          |
| $5.42 \times 10^{-5}$                            | 2.44                                                          | 0.33                                                          | 3.0                           |
